# Supplementary material
Source: HighWire-hosted journal article supplement (https://www.cmaj.ca/highwire/filestream/59951/field_highwire_adjunct_files/0/161407-image-1-at.pdf)

**APPENDIX 1 (as supplied by the author): Histopathology showing thrombi filled with fibrin and erythrocytes and the absence of vasculitis in the dermis (magnification x 200 and x 400).**

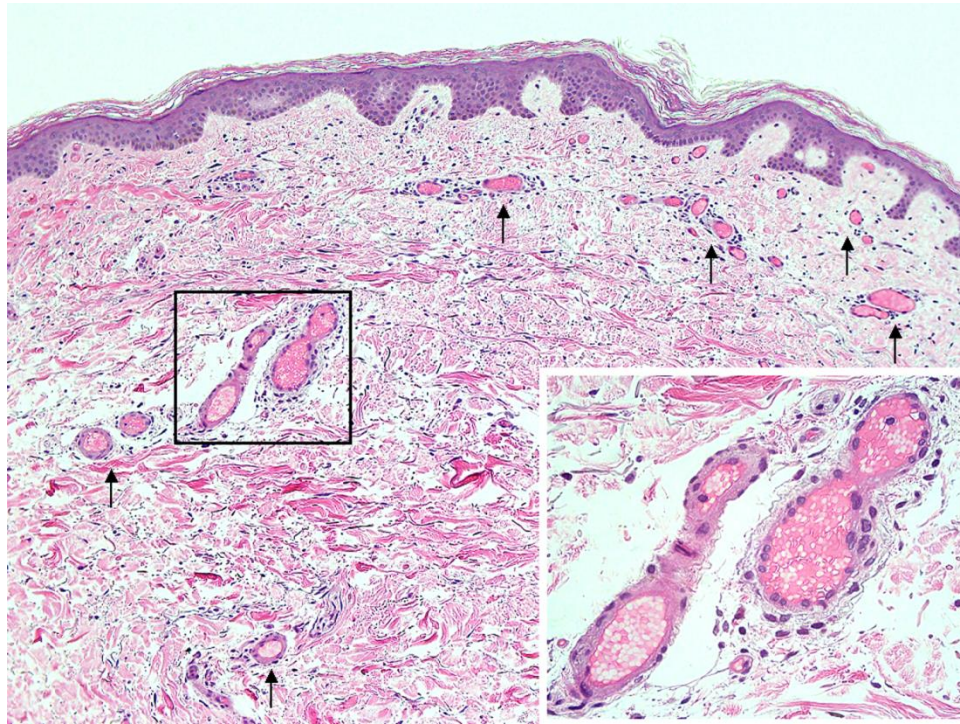

Supplement: 161407-image-1-at.pdf [file 161407-image-1-at.pdf]
